# Supplementary material
Source: HighWire-hosted journal article supplement (https://erj.ersjournals.com/content/56/4/2002665)
Supplement: inline-supplementary-material-1 [file inline-supplementary-material-1.pdf]

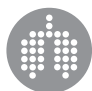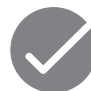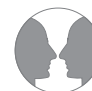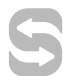

SHAREABLE PDF

# Impact of the SARS-CoV-2 epidemic on tuberculosis treatment outcome in Northern Italy

Paola Magro<sup>1,2,6</sup>, Beatrice Formenti<sup>3,6</sup>, Valentina Marchese<sup>2,4</sup>,  
Maurizio Gulletta<sup>5</sup>, Lina Rachele Tomasoni<sup>5</sup>, Silvio Caligaris<sup>5</sup>,  
Francesco Castelli<sup>1,2</sup> and Alberto Matteelli<sup>1,2</sup>

**Affiliations:** <sup>1</sup>Dept of Infectious and Tropical Diseases, University of Brescia, ASST Spedali Civili, Brescia, Italy. <sup>2</sup>WHO Collaborating Centre for TB/HIV and TB elimination, Brescia, Italy. <sup>3</sup>Dept of Infectious Diseases, ASST Spedali Civili of Brescia, Brescia, Italy. <sup>4</sup>Specialist Consultation Service, ASST Spedali Civili of Brescia, Brescia, Italy. <sup>5</sup>Unit of Tropical Diseases, ASST Spedali Civili, Brescia, Brescia, Italy. <sup>6</sup>These authors contributed equally.

**Correspondence:** Beatrice Formenti, Dept of Infectious Diseases, ASST Spedali Civili of Brescia, 25125 Brescia, Italy. E-mail: [beatriceformenti1992@gmail.com](mailto:beatriceformenti1992@gmail.com)

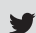

@ERSpublications

**It is important to recognise the impact of COVID-19 on TB care to mitigate its consequences. TB services have an urgent need to identify novel strategies to ensure the continuum of TB care at the time of the coronavirus pandemic.** <https://bit.ly/2OIKnwL>

**Cite this article as:** Magro P, Formenti B, Marchese V, *et al.* Impact of the SARS-CoV-2 epidemic on tuberculosis treatment outcome in Northern Italy. *Eur Respir J* 2020; 56: 2002665 [<https://doi.org/10.1183/13993003.02665-2020>].

This single-page version can be shared freely online.

## To the Editor:

We read with interest the letters by TADOLINI *et al.* [1] and STOCHINO *et al.* [2] in a recent issue of the *European Respiratory Journal*, which summarise the first available evidence on tuberculosis (TB) and coronavirus disease 2019 (COVID-19) [3].
